# Supplementary material for: Inhibition of FOXO1-Mediated Autophagy Promotes Paclitaxel-Induced Apoptosis in MDA-MB-231 Cell Lines
Source: Research Square preprint supplement (doi:10.21203/rs.3.rs-895429/v1), 2021-09-22
Supplement: Supplementary file 1 [file 7c27ae3c6f3ce2ac723f61db.docx]

Supplementary Table 1 primer sequences for q-PCR

| Primer | Sequence |
| --- | --- |
| SESN1 | F: 5’-CCCCTACATTATCGTCACTACA-3’ |
|  | R: 5’-CAAGGTCTATGGGCTAACACT-3’ |
| PTEN | F: 5’-TTGACCAATGGCTAAGTGAAG-3’ |
|  | R: 5’-AATACCTCCTGTAGGATCTGC-3’ |
| mTOR | F: 5’-TTACCGCTGAGTACGTGGAATT-3’ |
|  | R: 5’-AATGTTGTCAAAGAAGGGTTGC-3’ |
| EPG5 | F: 5’-GCTTTTGAACTACTCACGATG-3’ |
|  | R: 5’-ACTCTTTGGTAGCGATGATAG-3’ |
| TSC1 | F: 5’-AAATTCCACCTCCGACGAGA-3’ |
|  | R: 5’-TCAGTCTGTCCAGCACTTCCA-3’ |
| AKT | F: 5’-CGGCAAGGTGATCCTGGTGAA-3’ |
|  | R: 5’-CGGTCGTGGGTCTGGAAAGAGTA-3’ |
| LKB1 | F: 5’-ACATCTGGTCGGCTGGGGTCA-3’ |
|  | R: 5’-CGGTTCGTACTCAAGCATCCCTTT-3’ |
| FOXO1 | F: 5’-ATGGCAGCCAGGCATCTCATA-3’ |
|  | R: 5’-CTTGGGTCAGGCGGTTCATAC-3’ |
| LMNA | F: 5’-TAGACCCTGGGTGGGCTCTGTG-3’ |
|  | R: 5’-GGAGGCAAGGGCTCTTTAGCG-3’ |
| AMARB1 | F: 5’-TAATGTGAATAGAGGAACAAGTGGGTAT-3’ |
|  | R: 5’-AACAGGTGGACAGGGCAAAGC-3’ |
| DRAM2 | F: 5’-ATGATTATGATTCTCAGGGAT-3’ |
|  | R: 5’-AAAGTATAGGCATAGGTGTTTT-3’ |
| ATG5 | F: 5’-CAGAATGCAGGGAACACTAAG-3’ |
|  | R: 5’-GATGCTGGTACAATAATGAATGAG-3’ |
| BECN1 | F: 5’-TGAGGGATGGAAGGGTCTAAG-3’ |
|  | R: 5’-CCTGGGCTGTGGTAAGTAATG-3’ |
| VPS34 | F: 5’-GTACAACGCGAAAGTGGAAAT-3’ |
|  | R: 5’-AACAACTGTGCAGGCATAAGG-3’ |
| ATG4B | F: 5’-TGTGATGGAGGAAATCAGAAGGTTG-3’ |
|  | R: 5’-CCTCGTTGATGTCCGTGAGCC-3’ |
| MAP1LC3B | F: 5’-CGCTTACAGCTCAATGCTAAT-3’ |
|  | R: 5’-ACTGACAATTTCATCCCGAAC-3’ |
| GAPDH | F: 5’-GGCGCTGAGTACGTCGTGGAGT-3’ |
|  | R: 5’-AGTTGGTGGTGCAGGAGGCATT-3’ |
